# Supplementary material
Source: PubMed Central journal article supplement (PMC3761298)
Supplement: 62e70b61048495b8159c490843a8a409_genetics.113.152728-8.pdf [file 62e70b61048495b8159c490843a8a409_genetics.113.152728-8.pdf]

**Table S1 Plasmids used in this study**

| Plasmid                                          | Relevant markers                                                                                                           | Reference                    |
|--------------------------------------------------|----------------------------------------------------------------------------------------------------------------------------|------------------------------|
| pRS316                                           | <i>CEN6 ARSH4 URA3 Amp<sup>r</sup> f1 origin</i>                                                                           | SIKORSKI and HIETER 1989     |
| pKG9                                             | <i>NatMX</i>                                                                                                               | GREENLAND <i>et al.</i> 2010 |
| pJT12                                            | <i>NDC80 ADE3 LYS2</i> in 2 $\mu$ m vector                                                                                 | This study                   |
| pJT36                                            | <i>NDC80</i> in pRS316                                                                                                     | This study                   |
| pJT153                                           | <i>GFP-NDC80</i> in pRS316                                                                                                 | This study                   |
| pJT185                                           | <i>ins506 GFP-ndc80</i> in pRS316                                                                                          | This study                   |
| pJT187                                           | <i>ins656 GFP-ndc80</i> in pRS316                                                                                          | This study                   |
| pJT188                                           | <i>ins839 GFP-ndc80</i> in pRS316                                                                                          | This study                   |
| pJT189                                           | <i>ins940 GFP-ndc80</i> in pRS316                                                                                          | This study                   |
| pJT190                                           | <i>ins1148 GFP-ndc80</i> in pRS316                                                                                         | This study                   |
| pJT154                                           | <i>ins1687 GFP-ndc80</i> in pRS316                                                                                         | This study                   |
| pJT155                                           | <i>ins1957 GFP-ndc80</i> in pRS316                                                                                         | This study                   |
| His <sub>6</sub> -Spc24/Spc25 expression plasmid | <i>His<sub>6</sub>-SPC24/SPC25</i> dicistron, <i>Kan<sup>r</sup></i>                                                       | WEI <i>et al.</i> 2005       |
| Ndc80/Nuf2-GFP expression plasmid                | <i>NDC80/NUF2-GFP</i> dicistron, <i>Amp<sup>r</sup></i>                                                                    | POWERS <i>et al.</i> 2009    |
| pJT138                                           | <i>ins506 ndc80/NUF2-GFP</i> dicistron, <i>Amp<sup>r</sup></i>                                                             | This study                   |
| pJT139                                           | <i>ins511 ndc80/NUF2-GFP</i> dicistron, <i>Amp<sup>r</sup></i>                                                             | This study                   |
| pJT140                                           | <i>ins656 ndc80/NUF2-GFP</i> dicistron, <i>Amp<sup>r</sup></i>                                                             | This study                   |
| pJT141                                           | <i>ins839 ndc80/NUF2-GFP</i> dicistron, <i>Amp<sup>r</sup></i>                                                             | This study                   |
| pJT142                                           | <i>ins940 ndc80/NUF2-GFP</i> dicistron, <i>Amp<sup>r</sup></i>                                                             | This study                   |
| pJT143                                           | <i>ins1148 ndc80/NUF2-GFP</i> dicistron, <i>Amp<sup>r</sup></i>                                                            | This study                   |
| pJT145                                           | <i>ins1687 ndc80/NUF2-GFP</i> dicistron, <i>Amp<sup>r</sup></i>                                                            | This study                   |
| pJT146                                           | <i>ins1957 ndc80/NUF2-GFP</i> dicistron, <i>Amp<sup>r</sup></i>                                                            | This study                   |
| Dam1 complex expression plasmid                  | <i>DAD4/DAD3/DAD2/SPC19/ASK1</i> and <i>DAD1/DUO1/SPC34-His<sub>6</sub>/DAM1/HSK3</i> polycistrons, <i>Amp<sup>r</sup></i> | MIRANDA <i>et al.</i> 2005   |
