# Supplementary material
Source: PubMed Central journal article supplement (PMC3761298)
Supplement: 75c0dc33d9c5dbe6e32147c8f4e6be5c_genetics.113.152728-1.pdf [file 75c0dc33d9c5dbe6e32147c8f4e6be5c_genetics.113.152728-1.pdf]

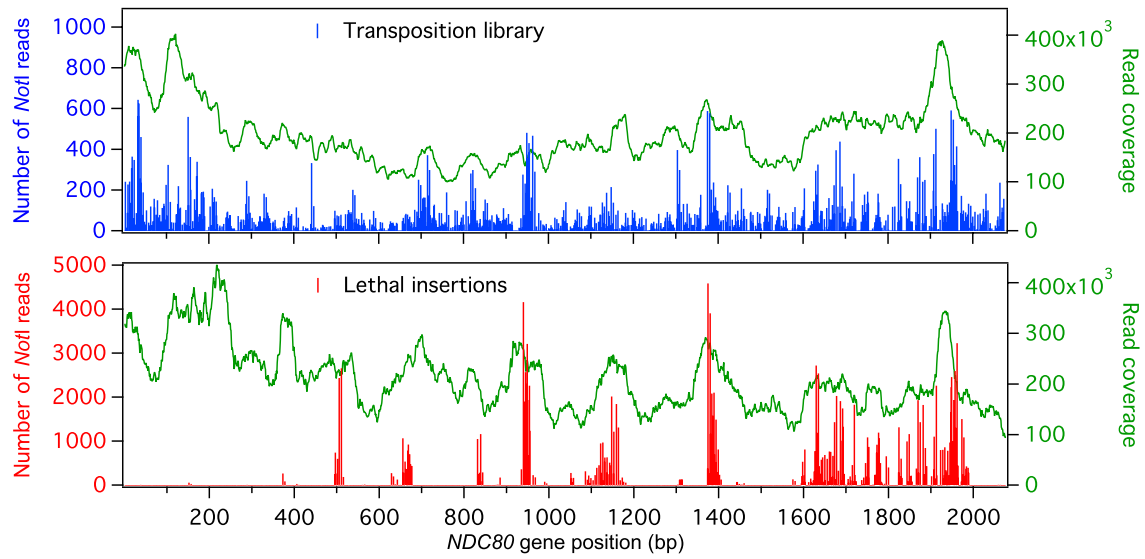

**Figure S1** Positions of 15-bp insertions in the transposition library (blue lines) and from the non-sectored red colonies (red lines) were determined by Illumina sequencing. Insertions were identified using the unique *NotI* recognition sequence and shown along the *NDC80* gene. The read coverage from the sequencing is shown in green.

**A****Original:** 5' - NNN12345NNN - 3'**Frame 1:** 5' - N12 345 TGC GGC CGC A12 345 NNN - 3'  
X X Cys Gly Arg X<sup>1</sup> X X**Frame 2:** 5' - NN1 234 5TG CGG CCG CA1 234 5NN - 3'  
X X Leu Arg Pro His X X  
Met Gln  
Val**Frame 3:** 5' - NNN 123 45T GCG GCC GCA 123 45N - 3'  
X X X<sup>2</sup> Ala Ala Ala X X**Example insertion:****Original:** 5' - CAA**GTGGT**TAT - 3'**Frame 1:** 5' - **AGT GGT TGC GGC CGC AGT GGT** TAT - 3'  
Ser Gly Cys Gly Arg Ser Gly Tyr**Frame 2:** 5' - AAG **TGG TTG CGG CCG CAG TGG** TTA - 3'  
Lys Trp Leu Arg Pro Gln Trp Leu**Frame 3:** 5' - CAA **GTG GTT GCG GCC GCA GTG GTT** - 3'  
Gln Val Val Ala Ala Ala Val Val**B**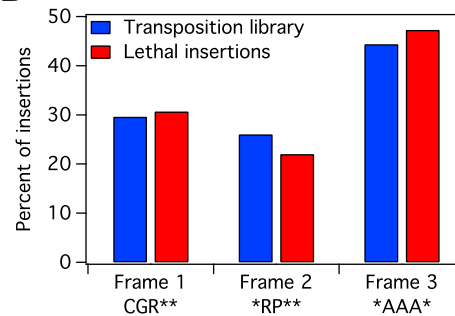**C**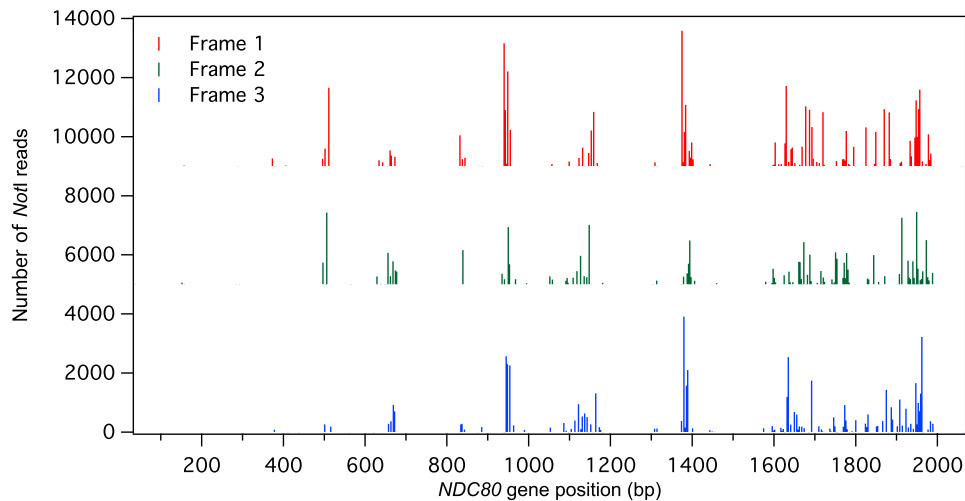

**Figure S2** The reading frame targeted by transposition dictates the residues inserted. (A) The translation of the insertion depends on both the frame of insertion and the target sequence (adapted from Finzymes Manual F-701). In the transposition library, each 15-bp insertion includes 5 bp of duplicated target sequence (red) and 10 additional nucleotides (blue). X is any amino acid; X<sup>1</sup> is Ile, Met, Thr, Asn, Lys, Ser, or Arg; X<sup>2</sup> is any amino acid except Gln, Glu, Lys, Met, and Trp. An example insertion is also shown. (B) The proportion of lethal insertions in each frame (red) is similar to that of the initial transposition library (blue). (C) The positions of lethal insertions (from Figure S1) are separated based on the frame of insertion. Traces are offset vertically for visual clarity.

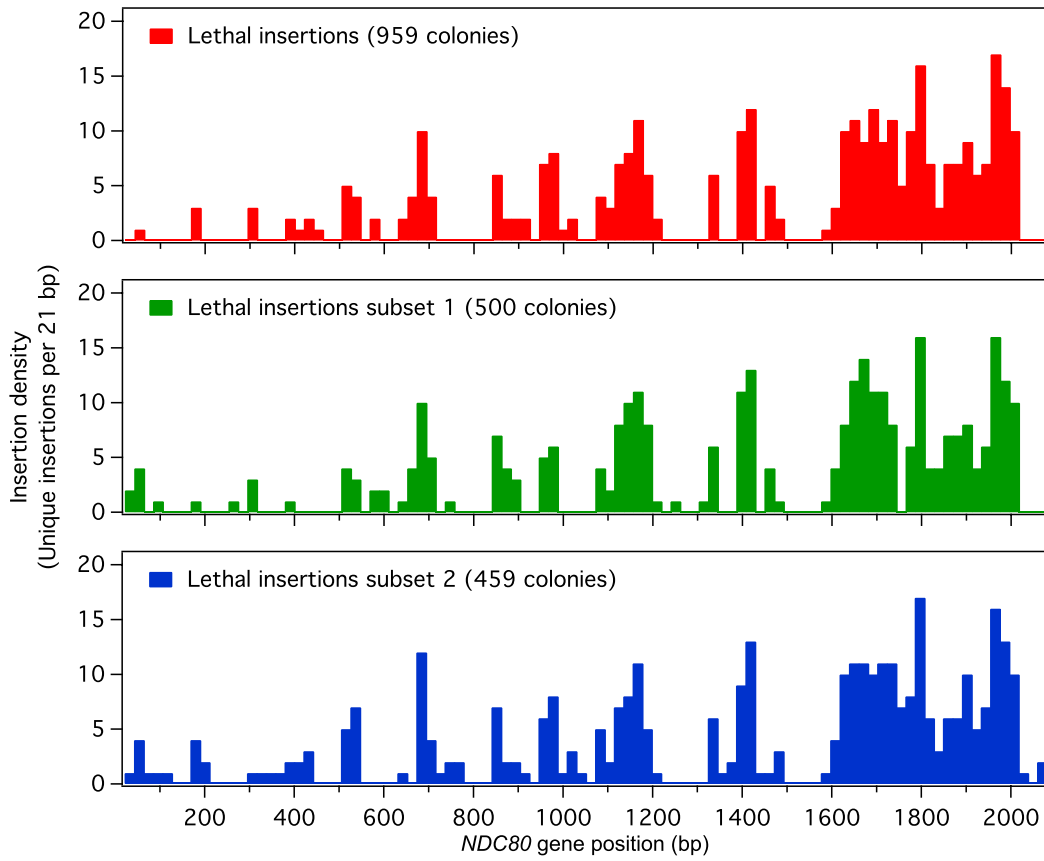

**Figure S3** Validation of the lethal insertion clusters. Two subsets (green and blue bars) sequenced independently have the same lethal insertion clusters as the original 959 non-sectoring red colonies (red bars, from Figure 3D).

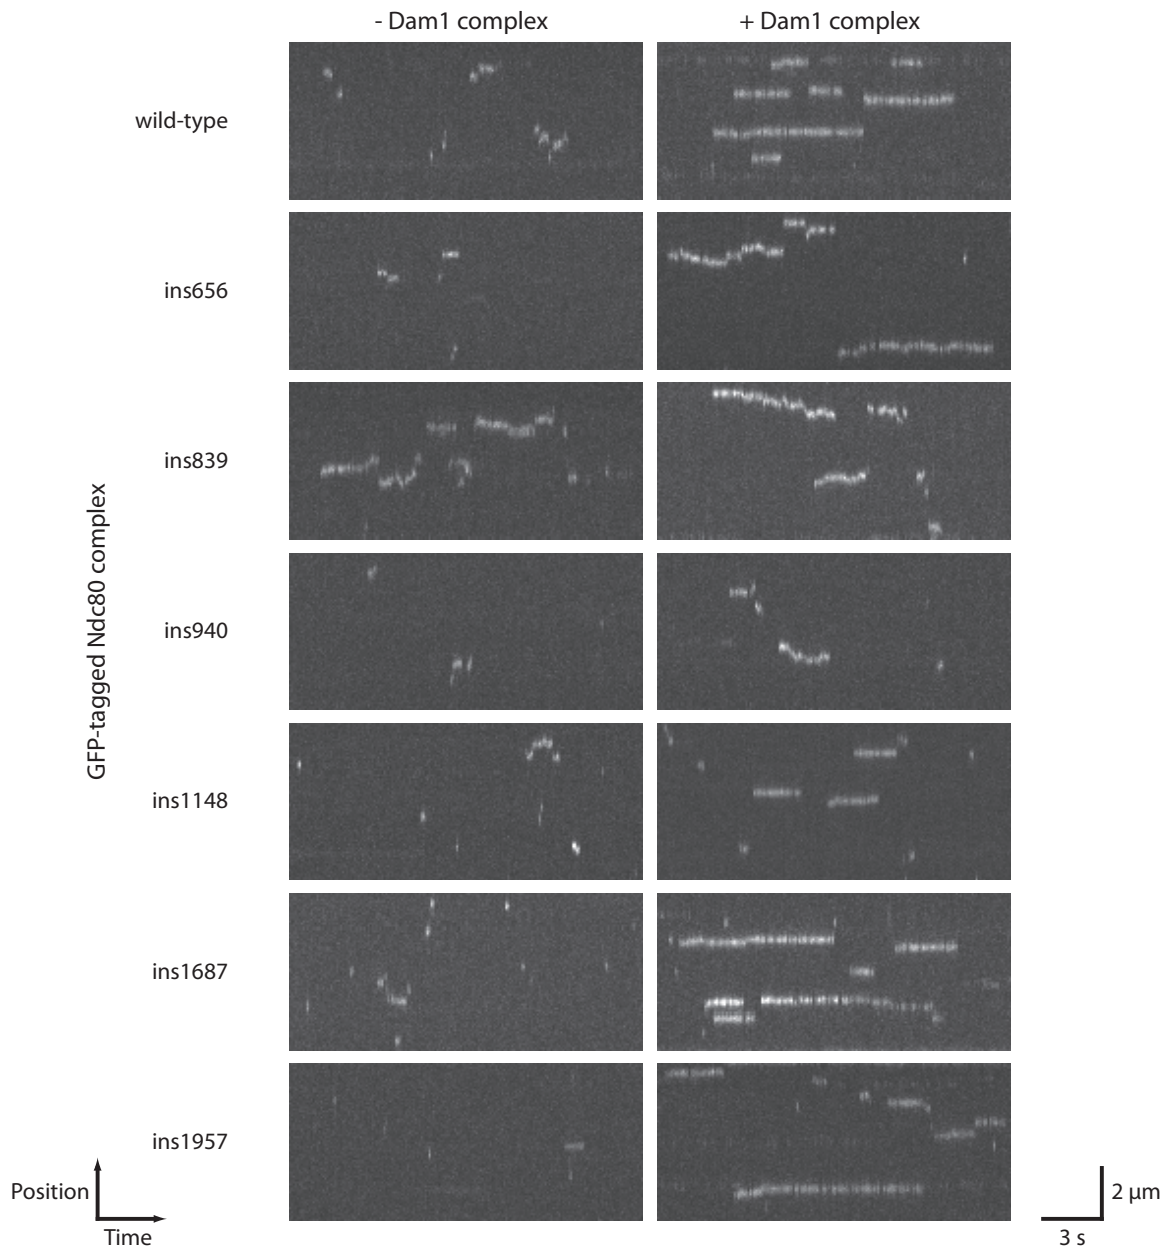

**Figure S4** Lethal insertion mutants affect the ability of the Dam1 complex to enhance binding of the Ndc80 complex to microtubules. Using TIRF microscopy, single molecules of GFP-tagged Ndc80 complexes were visualized on taxol-stabilized microtubules. Representative kymographs show the binding and one-dimensional diffusion of 50 pM GFP-tagged Ndc80 complexes on microtubules in the presence or absence of 2.5 nM untagged Dam1 complex.

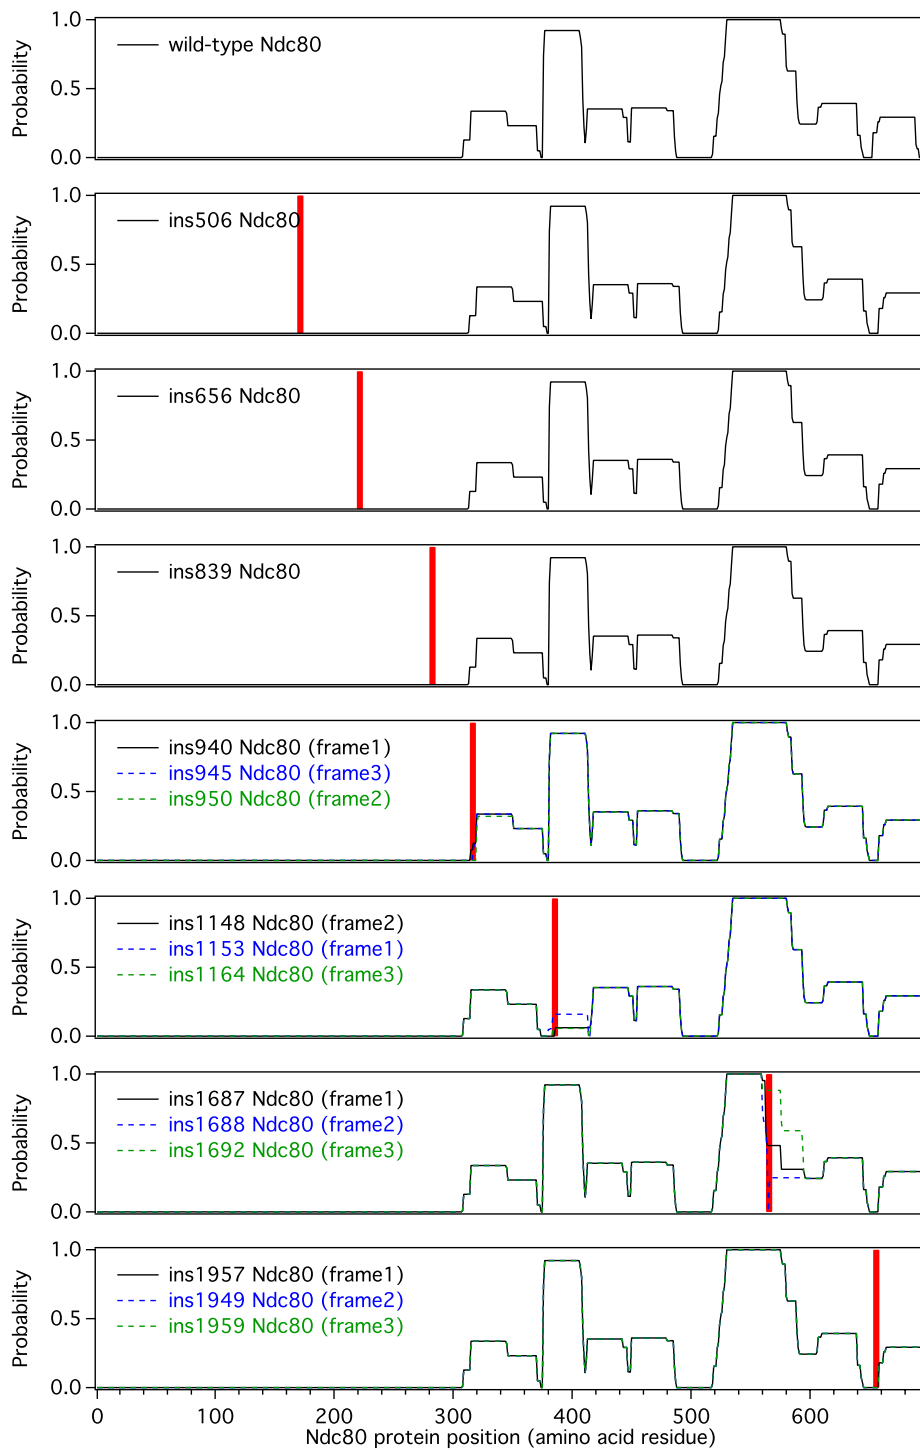

**Figure S5** The effect of lethal insertions in Ndc80 on predicted coiled-coil formation. The probabilities of coiled-coil formation, as predicted by Paircoil2 (McDONNELL *et al.* 2006), for Ndc80 containing the representative lethal insertions studied (black lines). Vertical red lines denote the positions of the representative insertions. The probabilities of coiled-coil formation for additional lethal insertions are also shown (blue and green dotted lines).

**Table S1 Plasmids used in this study**

| Plasmid                                          | Relevant markers                                                                                                           | Reference                    |
|--------------------------------------------------|----------------------------------------------------------------------------------------------------------------------------|------------------------------|
| pRS316                                           | <i>CEN6 ARSH4 URA3 Amp<sup>r</sup> f1 origin</i>                                                                           | SIKORSKI and HIETER 1989     |
| pKG9                                             | <i>NatMX</i>                                                                                                               | GREENLAND <i>et al.</i> 2010 |
| pJT12                                            | <i>NDC80 ADE3 LYS2</i> in 2 $\mu$ m vector                                                                                 | This study                   |
| pJT36                                            | <i>NDC80</i> in pRS316                                                                                                     | This study                   |
| pJT153                                           | <i>GFP-NDC80</i> in pRS316                                                                                                 | This study                   |
| pJT185                                           | <i>ins506 GFP-ndc80</i> in pRS316                                                                                          | This study                   |
| pJT187                                           | <i>ins656 GFP-ndc80</i> in pRS316                                                                                          | This study                   |
| pJT188                                           | <i>ins839 GFP-ndc80</i> in pRS316                                                                                          | This study                   |
| pJT189                                           | <i>ins940 GFP-ndc80</i> in pRS316                                                                                          | This study                   |
| pJT190                                           | <i>ins1148 GFP-ndc80</i> in pRS316                                                                                         | This study                   |
| pJT154                                           | <i>ins1687 GFP-ndc80</i> in pRS316                                                                                         | This study                   |
| pJT155                                           | <i>ins1957 GFP-ndc80</i> in pRS316                                                                                         | This study                   |
| His <sub>6</sub> -Spc24/Spc25 expression plasmid | <i>His<sub>6</sub>-SPC24/SPC25</i> dicistron, <i>Kan<sup>r</sup></i>                                                       | WEI <i>et al.</i> 2005       |
| Ndc80/Nuf2-GFP expression plasmid                | <i>NDC80/NUF2-GFP</i> dicistron, <i>Amp<sup>r</sup></i>                                                                    | POWERS <i>et al.</i> 2009    |
| pJT138                                           | <i>ins506 ndc80/NUF2-GFP</i> dicistron, <i>Amp<sup>r</sup></i>                                                             | This study                   |
| pJT139                                           | <i>ins511 ndc80/NUF2-GFP</i> dicistron, <i>Amp<sup>r</sup></i>                                                             | This study                   |
| pJT140                                           | <i>ins656 ndc80/NUF2-GFP</i> dicistron, <i>Amp<sup>r</sup></i>                                                             | This study                   |
| pJT141                                           | <i>ins839 ndc80/NUF2-GFP</i> dicistron, <i>Amp<sup>r</sup></i>                                                             | This study                   |
| pJT142                                           | <i>ins940 ndc80/NUF2-GFP</i> dicistron, <i>Amp<sup>r</sup></i>                                                             | This study                   |
| pJT143                                           | <i>ins1148 ndc80/NUF2-GFP</i> dicistron, <i>Amp<sup>r</sup></i>                                                            | This study                   |
| pJT145                                           | <i>ins1687 ndc80/NUF2-GFP</i> dicistron, <i>Amp<sup>r</sup></i>                                                            | This study                   |
| pJT146                                           | <i>ins1957 ndc80/NUF2-GFP</i> dicistron, <i>Amp<sup>r</sup></i>                                                            | This study                   |
| Dam1 complex expression plasmid                  | <i>DAD4/DAD3/DAD2/SPC19/ASK1</i> and <i>DAD1/DUO1/SPC34-His<sub>6</sub>/DAM1/HSK3</i> polycistrons, <i>Amp<sup>r</sup></i> | MIRANDA <i>et al.</i> 2005   |

**Table S2 Yeast strains used in this study**

| Strain    | Genotype                                                                                                                                                                                                                            | Reference  |
|-----------|-------------------------------------------------------------------------------------------------------------------------------------------------------------------------------------------------------------------------------------|------------|
| W303      | <i>ade2-1oc can1-100 his3-11,15 leu2-3,112 trp1-1 ura3-1</i>                                                                                                                                                                        |            |
| JTY1      | <i>MATa/α ade2-1oc/ade2-1oc ade3Δ-100/ade3Δ-100 can1-100/can1-100 cyh2<sup>f</sup>/CYH2<sup>s</sup><br/>his3-11,15/his3-11,15 leu2-3,112/leu2-3,112 lys2Δ::HIS3/lys2Δ::HIS3 trp1-1/trp1-1 ura3-1/ura3-1</i>                         | This study |
| JTY4      | <i>MATa/α ade2-1oc/ade2-1oc ade3Δ-100/ade3Δ-100 can1-100/can1-100 cyh2<sup>f</sup>/CYH2<sup>s</sup><br/>his3-11,15/his3-11,15 leu2-3,112/leu2-3,112 lys2Δ::HIS3/lys2Δ::HIS3 trp1-1/trp1-1 ura3-1/ura3-1<br/>NDC80/ndc80Δ::NatMX</i> | This study |
| JTY5-5C   | <i>MATa ade2-1oc ade3Δ-100 can1-100 cyh2<sup>f</sup> his3-11,15 leu2-3,112 lys2Δ::HIS3 trp1-1 ura3-1<br/>ndc80Δ::NatMX [pJT12]</i>                                                                                                  | This study |
| JTY12-25A | <i>MATa ade2-1oc ade3Δ-100 can1-100 cyh2<sup>f</sup> his3-11,15 leu2-3,112 trp1-1 ura3-1 NDC80<br/>NUF2-mCherry::hphMX</i>                                                                                                          | This study |
| JTY29-1B  | <i>MATα ade2-1oc ade3Δ-100 can1-100 cyh2<sup>f</sup> his3-11,15 leu2-3,112 trp1-1 ura3-1 NUF2</i>                                                                                                                                   | This study |
| JTY29-1C  | <i>MATα ade2-1oc ade3Δ-100 can1-100 CYH2<sup>s</sup> his3-11,15 leu2-3,112 trp1-1 ura3-1<br/>NUF2-TAP::KanMX</i>                                                                                                                    | This study |
| JTY47-2A  | <i>MATa ade2-1oc ade3Δ-100 can1-100 CYH2<sup>s</sup> his3-11,15 leu2-3,112 trp1-1 ura3-1 SPC24</i>                                                                                                                                  | This study |
| JTY47-2B  | <i>MATα ade2-1oc ade3Δ-100 can1-100 cyh2<sup>f</sup> his3-11,15 leu2-3,112 trp1-1 ura3-1<br/>SPC24-TAP::KanMX</i>                                                                                                                   | This study |

**Table S3 Oligonucleotides used for Illumina sequencing**

| Primer                                 | Sequence                                                        |
|----------------------------------------|-----------------------------------------------------------------|
| <i>NDC80</i> forward PCR primer        | TAAAGGGAACAAAAGCTGGG                                            |
| <i>NDC80</i> reverse PCR primer        | ACGCCAGTGAATTGTAA                                               |
| Multiplex adapter 1                    | 5' P-GATCGGAAGAGCACACGTCT                                       |
| Multiplex adapter 2                    | ACACTCTTCCCTACACGACGCTCTCCGATCT                                 |
| Multiplex forward PCR primer + index 1 | AATGATACGGCGACCACCGGATCTCGTGATACACTCTTCCCTACACGACGCTCTCCGATC    |
| Multiplex forward PCR primer + index 2 | AATGATACGGCGACCACCGGATCTACATCGACACTCTTCCCTACACGACGCTCTCCGATC    |
| Multiplex reverse PCR primer           | CAAGCAGAAGACGGCATACGAGATACACTCTTCCCTACACGACGCTCTCCGATCT         |
| Multiplex index sequencing primer      | AGATCGGAAGAGCGTCGTGTAGGGAAAGAGTGT                               |
| Multiplex read1 sequencing primer      | ACACTCTTCCCTACACGACGCTCTCCGATCT                                 |
| TruSeq Indexed Adapter AD002           | GATCGGAAGAGCACACGTCTGAACTCCAGTCACCGATGTATCTCGTATGCCGTCTTCTGCTTG |
| TruSeq Indexed Adapter AD018           | GATCGGAAGAGCACACGTCTGAACTCCAGTCACGTCCGCATCTCGTATGCCGTCTTCTGCTTG |
| TruSeq Indexed Adapter AD019           | GATCGGAAGAGCACACGTCTGAACTCCAGTCACGTGAAAATCTCGTATGCCGTCTTCTGCTTG |



**Table S4 Illumina sequencing results**

|                                                                                      | Transposition library | Lethal insertions | Lethal insertion subsets |            |
|--------------------------------------------------------------------------------------|-----------------------|-------------------|--------------------------|------------|
|                                                                                      |                       |                   | Subset 1                 | Subset 2   |
| Number of sequencing runs                                                            | 3                     | 1                 | 1                        | 1          |
| Number of 36-bp reads mapped to Chromosome IX                                        | 14,000,357            | 13,710,514        | 10,075,540               | 13,424,377 |
| Number of Chromosome IX reads containing <i>NotI</i>                                 | 96,569                | 166,135           | 290,126                  | 319,434    |
| Number of Chromosome IX reads with <i>NotI</i> in <i>NDC80</i> + promoter/terminator | 93,826                | N/A               | N/A                      | N/A        |
| Number of Chromosome IX reads with <i>NotI</i> in <i>NDC80</i>                       | 70,215                | 165,414           | 289,470                  | 318,637    |
| Number of unique <i>NotI</i> sites in <i>NDC80</i>                                   | 1,074                 | 336               | 320                      | 351        |
| Coverage of <i>NDC80</i> gene (%)                                                    | 52                    | 16                | 15                       | 17         |
| Number of unique codons containing insertions                                        | 444                   | 162               | 149                      | 165        |
| Coverage of Ndc80 protein (%)                                                        | 64                    | 23                | 22                       | 24         |

N/A, not applicable

## Literature Cited

- GREENLAND, K. B., H. DING, M. COSTANZO, C. BOONE and T. N. DAVIS, 2010 Identification of *Saccharomyces cerevisiae* spindle pole body remodeling factors. *PLoS One* **5**: e15426.
- McDONNELL, A. V., T. JIANG, A. E. KEATING and B. BERGER, 2006 Paircoil2: improved prediction of coiled coils from sequence. *Bioinformatics* **22**: 356-358.
- MIRANDA, J. J., P. DE WULF, P. K. SORGER and S. C. HARRISON, 2005 The yeast DASH complex forms closed rings on microtubules. *Nat Struct Mol Biol* **12**: 138-143.
- POWERS, A. F., A. D. FRANCK, D. R. GESTAUT, J. COOPER, B. GRACYZK *et al.*, 2009 The Ndc80 kinetochore complex forms load-bearing attachments to dynamic microtubule tips via biased diffusion. *Cell* **136**: 865-875.
- SIKORSKI, R. S., and P. HIETER, 1989 A system of shuttle vectors and yeast host strains designed for efficient manipulation of DNA in *Saccharomyces cerevisiae*. *Genetics* **122**: 19-27.
- WEI, R. R., P. K. SORGER and S. C. HARRISON, 2005 Molecular organization of the Ndc80 complex, an essential kinetochore component. *Proc Natl Acad Sci U S A* **102**: 5363-5367.
