# Supplementary material
Source: PubMed Central journal article supplement (PMC3761298)
Supplement: 84b09eddaa0be0eae0eb059c55914dab_genetics.113.152728-5.pdf [file 84b09eddaa0be0eae0eb059c55914dab_genetics.113.152728-5.pdf]

**Table S2 Yeast strains used in this study**

| Strain    | Genotype                                                                                                                                                                                                                                                                                                                              | Reference  |
|-----------|---------------------------------------------------------------------------------------------------------------------------------------------------------------------------------------------------------------------------------------------------------------------------------------------------------------------------------------|------------|
| W303      | <i>ade2-1oc can1-100 his3-11,15 leu2-3,112 trp1-1 ura3-1</i>                                                                                                                                                                                                                                                                          |            |
| JTY1      | MATa/ $\alpha$ <i>ade2-1oc/ade2-1oc ade3<math>\Delta</math>-100/ade3<math>\Delta</math>-100 can1-100/can1-100 cyh2<sup>f</sup>/CYH2<sup>s</sup><br/>his3-11,15/his3-11,15 leu2-3,112/leu2-3,112 lys2<math>\Delta</math>::HIS3/lys2<math>\Delta</math>::HIS3 trp1-1/trp1-1 ura3-1/ura3-1</i>                                           | This study |
| JTY4      | MATa/ $\alpha$ <i>ade2-1oc/ade2-1oc ade3<math>\Delta</math>-100/ade3<math>\Delta</math>-100 can1-100/can1-100 cyh2<sup>f</sup>/CYH2<sup>s</sup><br/>his3-11,15/his3-11,15 leu2-3,112/leu2-3,112 lys2<math>\Delta</math>::HIS3/lys2<math>\Delta</math>::HIS3 trp1-1/trp1-1 ura3-1/ura3-1<br/>NDC80/ndc80<math>\Delta</math>::NatMX</i> | This study |
| JTY5-5C   | MATa <i>ade2-1oc ade3<math>\Delta</math>-100 can1-100 cyh2<sup>f</sup> his3-11,15 leu2-3,112 lys2<math>\Delta</math>::HIS3 trp1-1 ura3-1<br/>ndc80<math>\Delta</math>::NatMX [pJT12]</i>                                                                                                                                              | This study |
| JTY12-25A | MATa <i>ade2-1oc ade3<math>\Delta</math>-100 can1-100 cyh2<sup>f</sup> his3-11,15 leu2-3,112 trp1-1 ura3-1 NDC80<br/>NUF2-mCherry::hphMX</i>                                                                                                                                                                                          | This study |
| JTY29-1B  | MAT $\alpha$ <i>ade2-1oc ade3<math>\Delta</math>-100 can1-100 cyh2<sup>f</sup> his3-11,15 leu2-3,112 trp1-1 ura3-1 NUF2</i>                                                                                                                                                                                                           | This study |
| JTY29-1C  | MAT $\alpha$ <i>ade2-1oc ade3<math>\Delta</math>-100 can1-100 CYH2<sup>s</sup> his3-11,15 leu2-3,112 trp1-1 ura3-1<br/>NUF2-TAP::KanMX</i>                                                                                                                                                                                            | This study |
| JTY47-2A  | MATa <i>ade2-1oc ade3<math>\Delta</math>-100 can1-100 CYH2<sup>s</sup> his3-11,15 leu2-3,112 trp1-1 ura3-1 SPC24</i>                                                                                                                                                                                                                  | This study |
| JTY47-2B  | MAT $\alpha$ <i>ade2-1oc ade3<math>\Delta</math>-100 can1-100 cyh2<sup>f</sup> his3-11,15 leu2-3,112 trp1-1 ura3-1<br/>SPC24-TAP::KanMX</i>                                                                                                                                                                                           | This study |
