# Supplementary material
Source: PubMed Central journal article supplement (PMC3761298)
Supplement: 222b7da498658caa852fe504dab9cac5_genetics.113.152728-4.pdf [file 222b7da498658caa852fe504dab9cac5_genetics.113.152728-4.pdf]

**Table S4 Illumina sequencing results**

|                                                                                      | Transposition library | Lethal insertions | Lethal insertion subsets |            |
|--------------------------------------------------------------------------------------|-----------------------|-------------------|--------------------------|------------|
|                                                                                      |                       |                   | Subset 1                 | Subset 2   |
| Number of sequencing runs                                                            | 3                     | 1                 | 1                        | 1          |
| Number of 36-bp reads mapped to Chromosome IX                                        | 14,000,357            | 13,710,514        | 10,075,540               | 13,424,377 |
| Number of Chromosome IX reads containing <i>NotI</i>                                 | 96,569                | 166,135           | 290,126                  | 319,434    |
| Number of Chromosome IX reads with <i>NotI</i> in <i>NDC80</i> + promoter/terminator | 93,826                | N/A               | N/A                      | N/A        |
| Number of Chromosome IX reads with <i>NotI</i> in <i>NDC80</i>                       | 70,215                | 165,414           | 289,470                  | 318,637    |
| Number of unique <i>NotI</i> sites in <i>NDC80</i>                                   | 1,074                 | 336               | 320                      | 351        |
| Coverage of <i>NDC80</i> gene (%)                                                    | 52                    | 16                | 15                       | 17         |
| Number of unique codons containing insertions                                        | 444                   | 162               | 149                      | 165        |
| Coverage of Ndc80 protein (%)                                                        | 64                    | 23                | 22                       | 24         |

N/A, not applicable
