# Supplementary material
Source: PubMed Central journal article supplement (PMC3761298)
Supplement: 4855bd4bea025c7faaae78309998a2bb_genetics.113.152728-9.pdf [file 4855bd4bea025c7faaae78309998a2bb_genetics.113.152728-9.pdf]

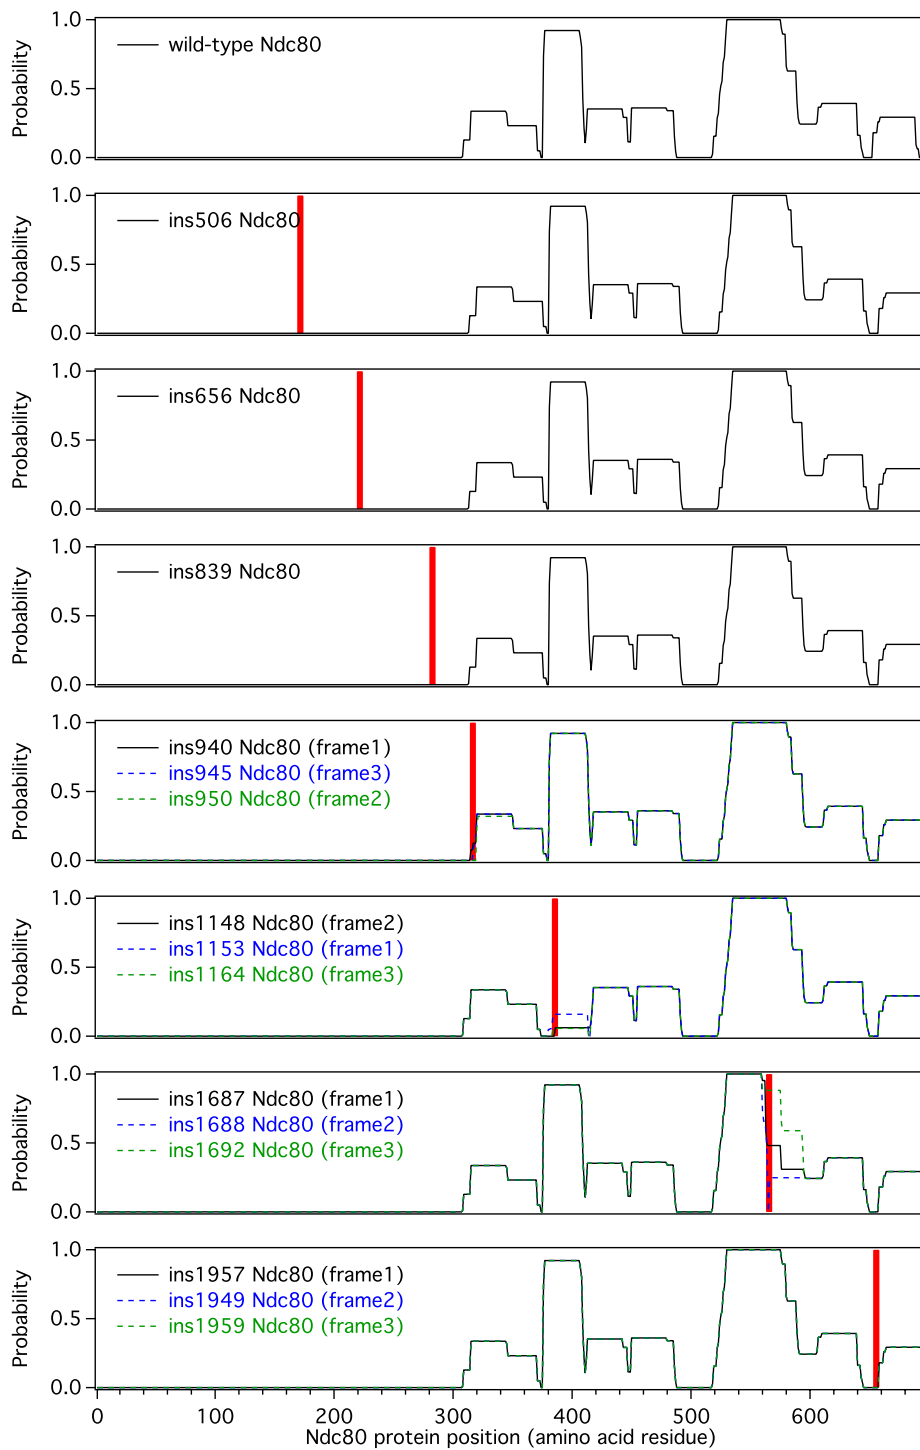

**Figure S5** The effect of lethal insertions in Ndc80 on predicted coiled-coil formation. The probabilities of coiled-coil formation, as predicted by Paircoil2 (McDONNELL *et al.* 2006), for Ndc80 containing the representative lethal insertions studied (black lines). Vertical red lines denote the positions of the representative insertions. The probabilities of coiled-coil formation for additional lethal insertions are also shown (blue and green dotted lines).
