# Supplementary material
Source: PubMed Central journal article supplement (PMC3761298)
Supplement: 122423a393b01d5b6fed4f4fa07ed8fe_genetics.113.152728-2.pdf [file 122423a393b01d5b6fed4f4fa07ed8fe_genetics.113.152728-2.pdf]

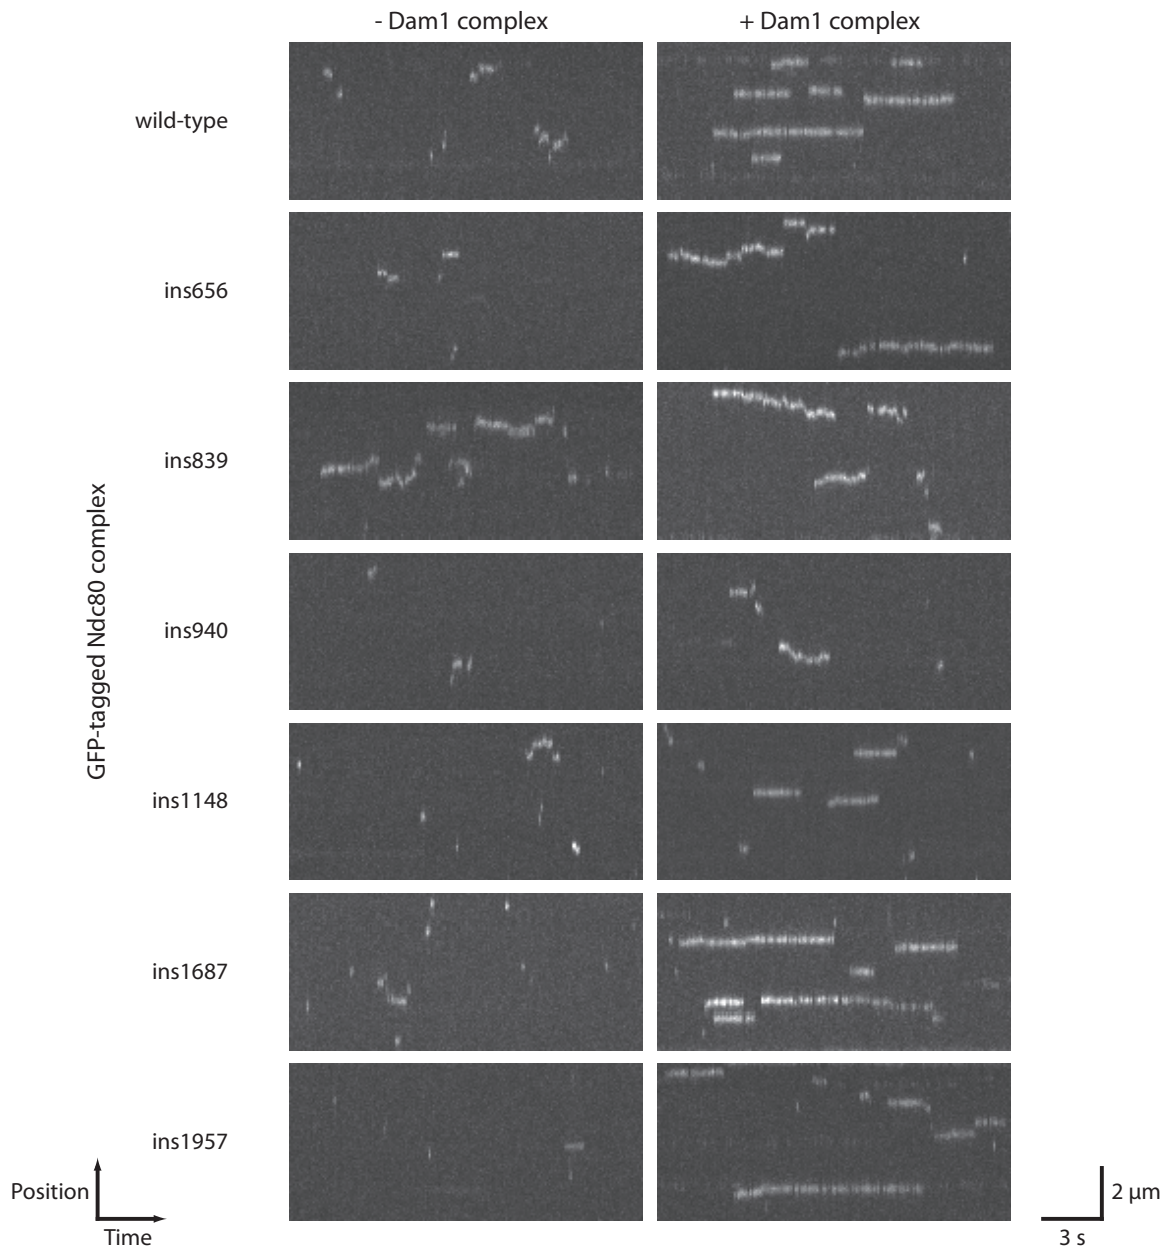

**Figure S4** Lethal insertion mutants affect the ability of the Dam1 complex to enhance binding of the Ndc80 complex to microtubules. Using TIRF microscopy, single molecules of GFP-tagged Ndc80 complexes were visualized on taxol-stabilized microtubules. Representative kymographs show the binding and one-dimensional diffusion of 50 pM GFP-tagged Ndc80 complexes on microtubules in the presence or absence of 2.5 nM untagged Dam1 complex.
