# Supplementary material
Source: PubMed Central journal article supplement (PMC3761298)
Supplement: 3194562d2353698173daabfc33503249_genetics.113.152728-3.pdf [file 3194562d2353698173daabfc33503249_genetics.113.152728-3.pdf]

## Literature Cited

- GREENLAND, K. B., H. DING, M. COSTANZO, C. BOONE and T. N. DAVIS, 2010 Identification of *Saccharomyces cerevisiae* spindle pole body remodeling factors. *PLoS One* **5**: e15426.
- McDONNELL, A. V., T. JIANG, A. E. KEATING and B. BERGER, 2006 Paircoil2: improved prediction of coiled coils from sequence. *Bioinformatics* **22**: 356-358.
- MIRANDA, J. J., P. DE WULF, P. K. SORGER and S. C. HARRISON, 2005 The yeast DASH complex forms closed rings on microtubules. *Nat Struct Mol Biol* **12**: 138-143.
- POWERS, A. F., A. D. FRANCK, D. R. GESTAUT, J. COOPER, B. GRACYZK *et al.*, 2009 The Ndc80 kinetochore complex forms load-bearing attachments to dynamic microtubule tips via biased diffusion. *Cell* **136**: 865-875.
- SIKORSKI, R. S., and P. HIETER, 1989 A system of shuttle vectors and yeast host strains designed for efficient manipulation of DNA in *Saccharomyces cerevisiae*. *Genetics* **122**: 19-27.
- WEI, R. R., P. K. SORGER and S. C. HARRISON, 2005 Molecular organization of the Ndc80 complex, an essential kinetochore component. *Proc Natl Acad Sci U S A* **102**: 5363-5367.
