# Supplementary material
Source: PubMed Central journal article supplement (PMC3761298)
Supplement: ca755c047c71dd9ff74ecb08ad8788a2_genetics.113.152728-6.pdf [file ca755c047c71dd9ff74ecb08ad8788a2_genetics.113.152728-6.pdf]

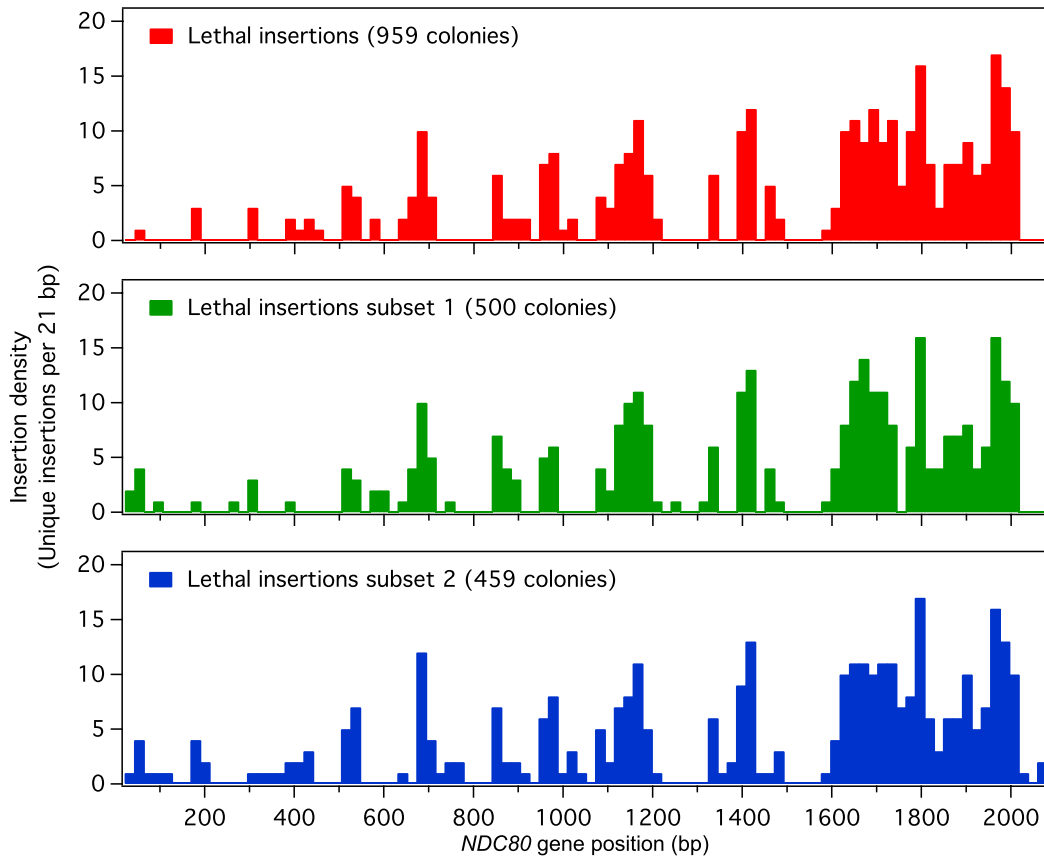

**Figure S3** Validation of the lethal insertion clusters. Two subsets (green and blue bars) sequenced independently have the same lethal insertion clusters as the original 959 non-sectoring red colonies (red bars, from Figure 3D).
