# Supplementary material
Source: PubMed Central journal article supplement (PMC3761298)
Supplement: e1010aa17b705f4987f5b3fe43c927ce_genetics.113.152728-10.pdf [file e1010aa17b705f4987f5b3fe43c927ce_genetics.113.152728-10.pdf]

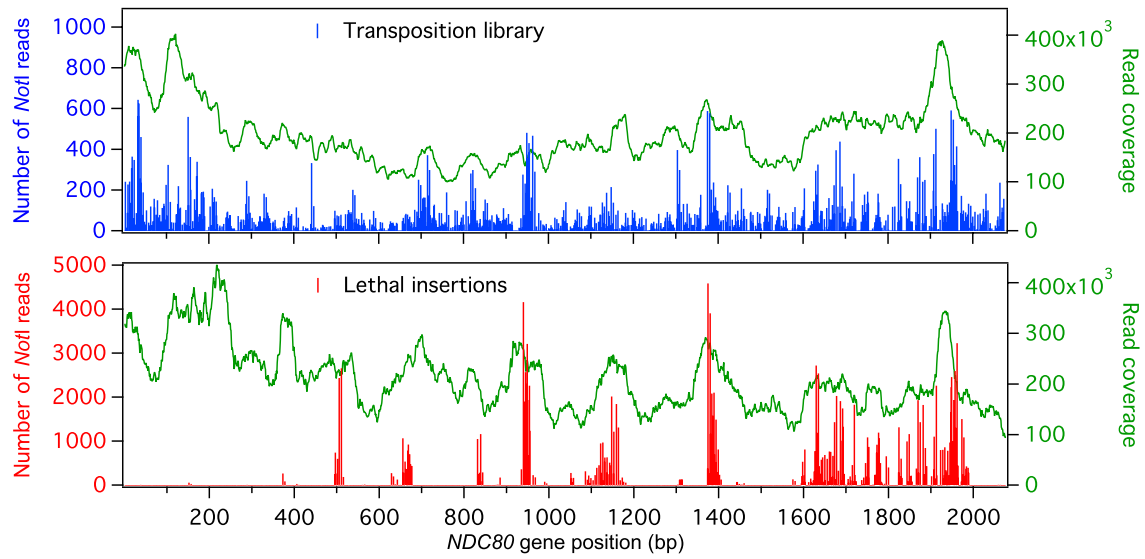

**Figure S1** Positions of 15-bp insertions in the transposition library (blue lines) and from the non-sectoring red colonies (red lines) were determined by Illumina sequencing. Insertions were identified using the unique *NotI* recognition sequence and shown along the *NDC80* gene. The read coverage from the sequencing is shown in green.
