# Supplementary material
Source: PubMed Central journal article supplement (PMC3761298)
Supplement: e31955791c057c0504eb1dc90b98761a_genetics.113.152728-11.pdf [file e31955791c057c0504eb1dc90b98761a_genetics.113.152728-11.pdf]

**Table S3 Oligonucleotides used for Illumina sequencing**

| Primer                                 | Sequence                                                        |
|----------------------------------------|-----------------------------------------------------------------|
| <i>NDC80</i> forward PCR primer        | TAAAGGGAACAAAAGCTGGG                                            |
| <i>NDC80</i> reverse PCR primer        | ACGCCAGTGAATTGTAA                                               |
| Multiplex adapter 1                    | 5' P-GATCGGAAGAGCACACGTCT                                       |
| Multiplex adapter 2                    | ACACTCTTCCCTACACGACGCTCTCCGATCT                                 |
| Multiplex forward PCR primer + index 1 | AATGATACGGCGACCACCGCATCTCGTGATACACTCTTCCCTACACGACGCTCTCCGATC    |
| Multiplex forward PCR primer + index 2 | AATGATACGGCGACCACCGCATCTACATCGACACTCTTCCCTACACGACGCTCTCCGATC    |
| Multiplex reverse PCR primer           | CAAGCAGAAGACGGCATACGAGATACACTCTTCCCTACACGACGCTCTCCGATCT         |
| Multiplex index sequencing primer      | AGATCGGAAGAGCGTCGTGTAGGGAAAGAGTGT                               |
| Multiplex read1 sequencing primer      | ACACTCTTCCCTACACGACGCTCTCCGATCT                                 |
| TruSeq Indexed Adapter AD002           | GATCGGAAGAGCACACGTCTGAACTCCAGTCACCGATGTATCTCGTATGCCGTCTTCTGCTTG |
| TruSeq Indexed Adapter AD018           | GATCGGAAGAGCACACGTCTGAACTCCAGTCACGTCCGCATCTCGTATGCCGTCTTCTGCTTG |
| TruSeq Indexed Adapter AD019           | GATCGGAAGAGCACACGTCTGAACTCCAGTCACGTGAAAATCTCGTATGCCGTCTTCTGCTTG |
